# Supplementary material for: Validation of Synthetic CRISPR Reagents as a Tool for Arrayed Functional Genomic Screening
Source: PubMed Central journal article supplement (PMC5193459; doi:10.1371/journal.pone.0168968), 2016-12-28

Supplemental Figure 1. crRNAs have no effect on HCT-116 cells lacking Cas9 in terms of nuclear count or nuclear area. Bars equal average (n=8) and standard deviation. siRNAs targeting GMNN and PLK1 exhibit expected effects under the same transfection conditions.

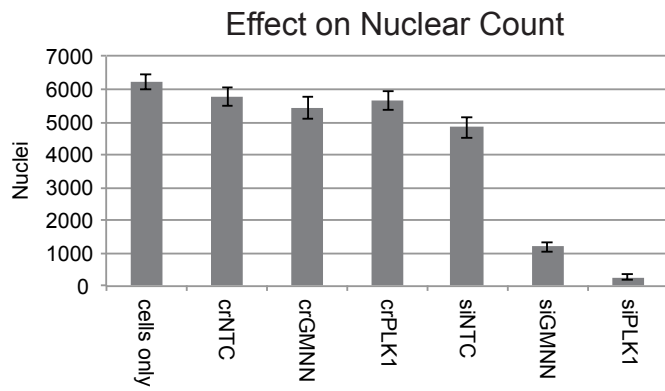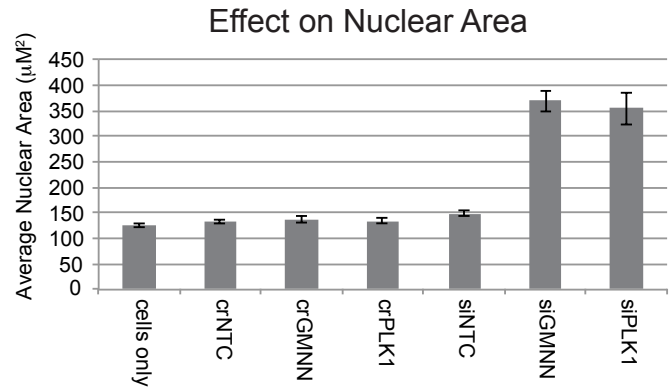

Supplement: pone.0168968.s001.pdf [file pone.0168968.s001.pdf]
