# Supplementary material for: Validation of Synthetic CRISPR Reagents as a Tool for Arrayed Functional Genomic Screening
Source: PubMed Central journal article supplement (PMC5193459; doi:10.1371/journal.pone.0168968), 2016-12-28

Supplemental Figure 2. The majority of HCT-116 Cas9 cells are affected by crGMNN. A. Histogram showing a shift in nuclear area for the majority of cells transfected with crRNA GMNN as compared to non-targeting crRNA in polyclonal HCT-116 cells. B. Clonal HCT-116 cells shows an even greater fraction of cells with ~7x increased nuclear area. C. Magnified version of the data in B.

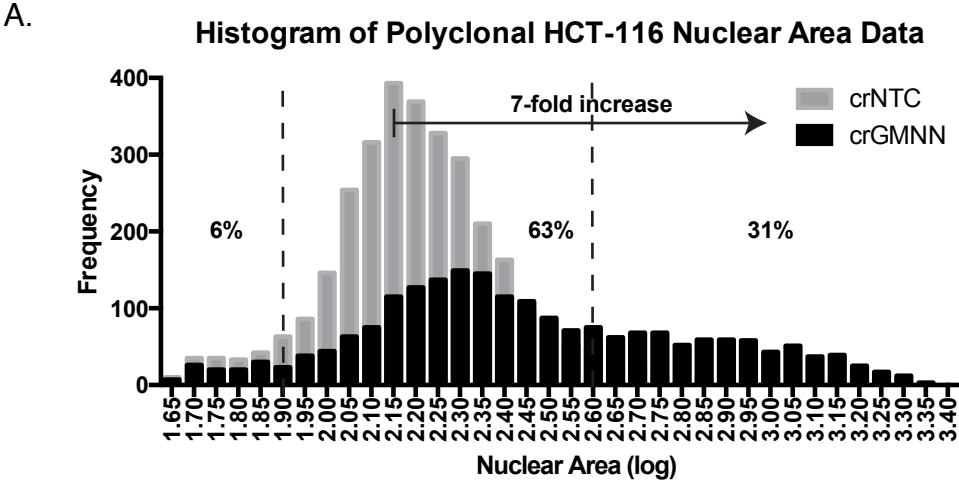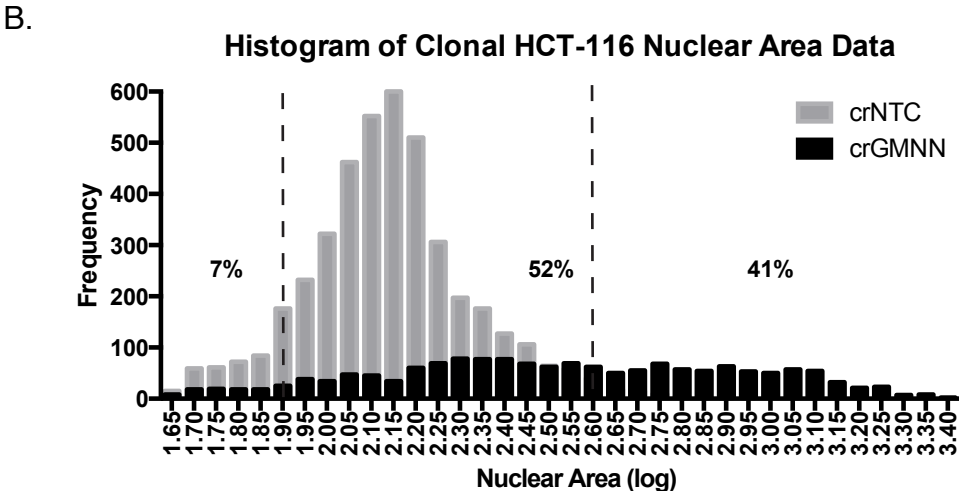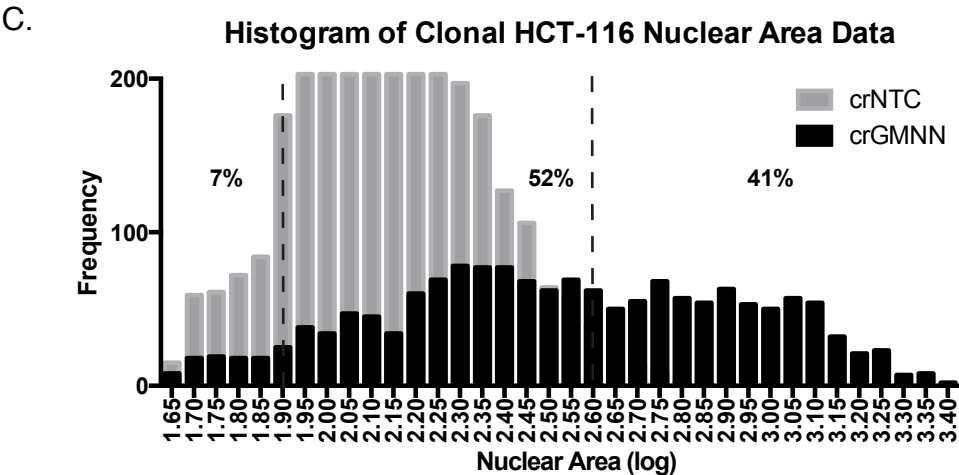

Supplement: pone.0168968.s002.pdf [file pone.0168968.s002.pdf]
