# Supplementary material for: Validation of Synthetic CRISPR Reagents as a Tool for Arrayed Functional Genomic Screening
Source: PubMed Central journal article supplement (PMC5193459; doi:10.1371/journal.pone.0168968), 2016-12-28

Supplemental Figure 4. Comparison of the effect of different guides (left) or siRNAs (right) targeting the same gene on measured nuclear area.

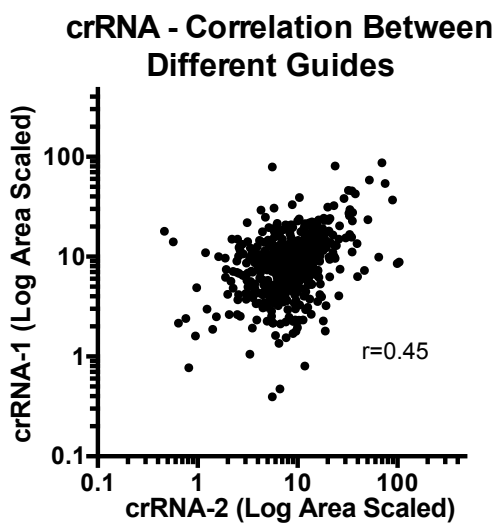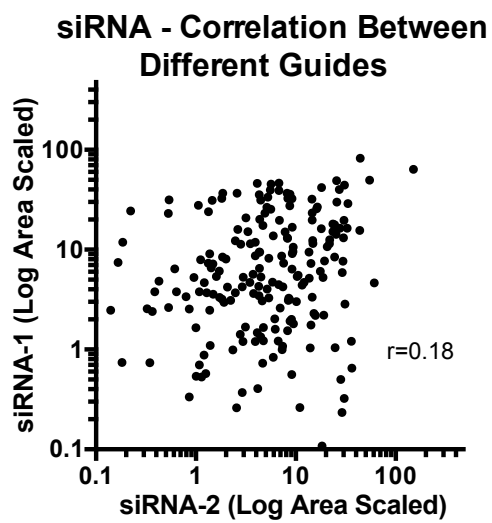

Supplement: pone.0168968.s004.pdf [file pone.0168968.s004.pdf]
